# Supplementary material
Source: PubMed Central journal article supplement (PMC6205372)
Supplement: jci-128-122631-s177.pdf [file jci-128-122631-s177.pdf]

**A**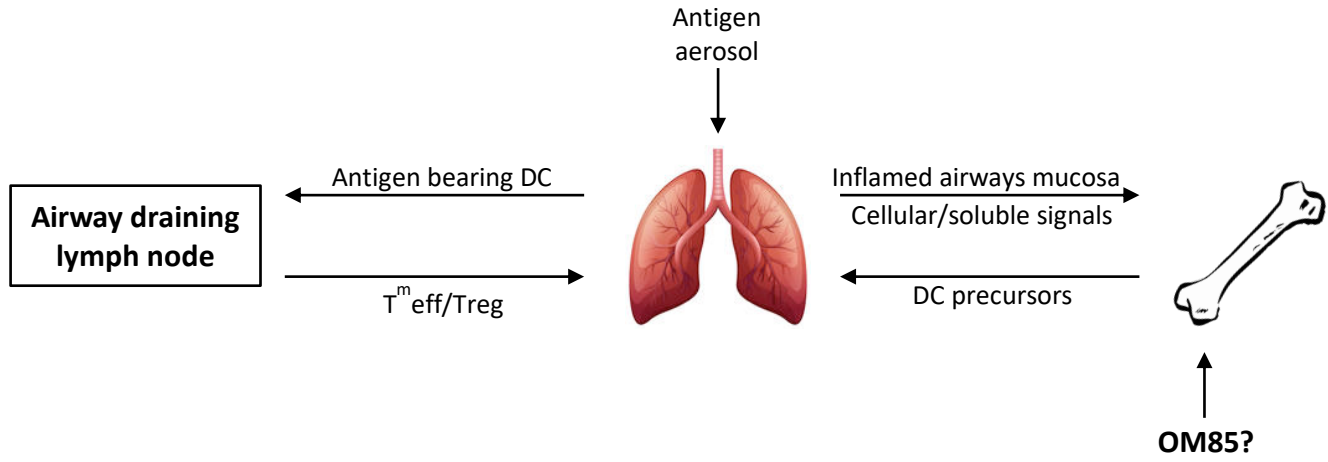**B**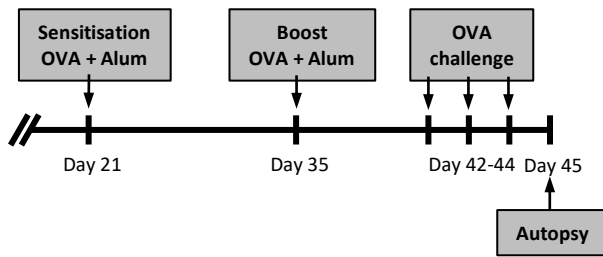**C**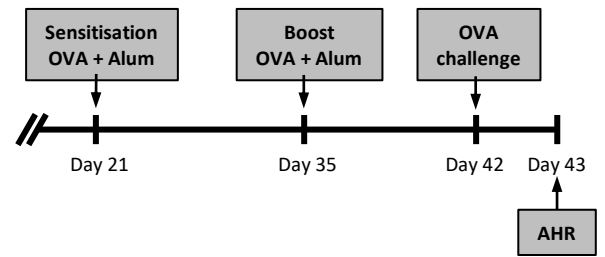**D**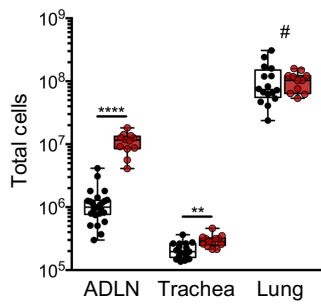**E**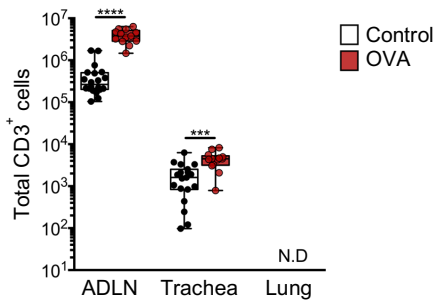**F**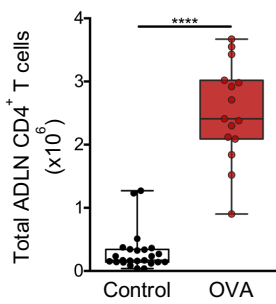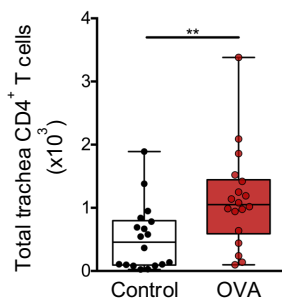**G**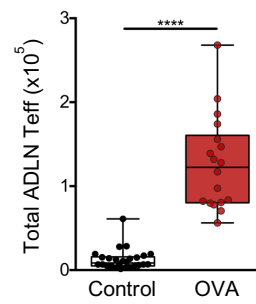**H**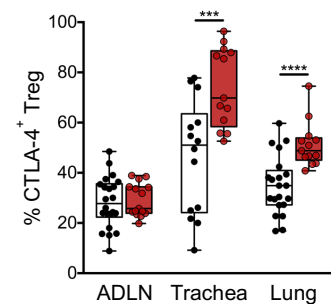**I**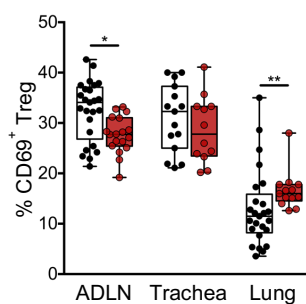

**Supplementary Figure 1. Offspring early life sensitisation and aeroallergen challenge T-cell response.** (A) Sequence of systemic cellular and signalling events occurring as a direct result of aeroallergen exposure. (B-C) Kinetics of early life sensitisation disease model employing a prime-boost OVA-Alum regime followed by (B) 3 consecutive or (C) a single 1% OVA aerosol challenge. (D) Total cellularity of ADLN, trachea and peripheral lung samples. (E) Absolute numbers of CD3<sup>+</sup> cells in ADLN and trachea samples. (F) Absolute numbers of CD3<sup>+</sup>CD4<sup>+</sup> T cells in ADLN and trachea samples. (G) Absolute numbers of T<sub>eff</sub> within ADLN samples. (H-I) Analysis of Tregs in ADLN, trachea and peripheral lung showing (H) proportion of Treg CTLA-4<sup>+</sup> and (I) proportion of Treg CD69<sup>+</sup>. Data are presented from individual animals comparing naïve controls (white) versus OVA sensitised and aerosol challenged offspring (with sample collection 24 hours post challenge; red) and displayed as box and whisker plot showing median, Q<sub>1</sub> and Q<sub>3</sub> and min to max values of n<sub>≥</sub>6 independent experiments. Total peripheral lung cells displayed as cells per milligram of tissue (#; D). Statistical significance was determined using Student's t-test or Mann Whitney test and presented as \*p<0.05, \*\*p<0.01, \*\*\*p<0.001, \*\*\*\*p<0.0001.

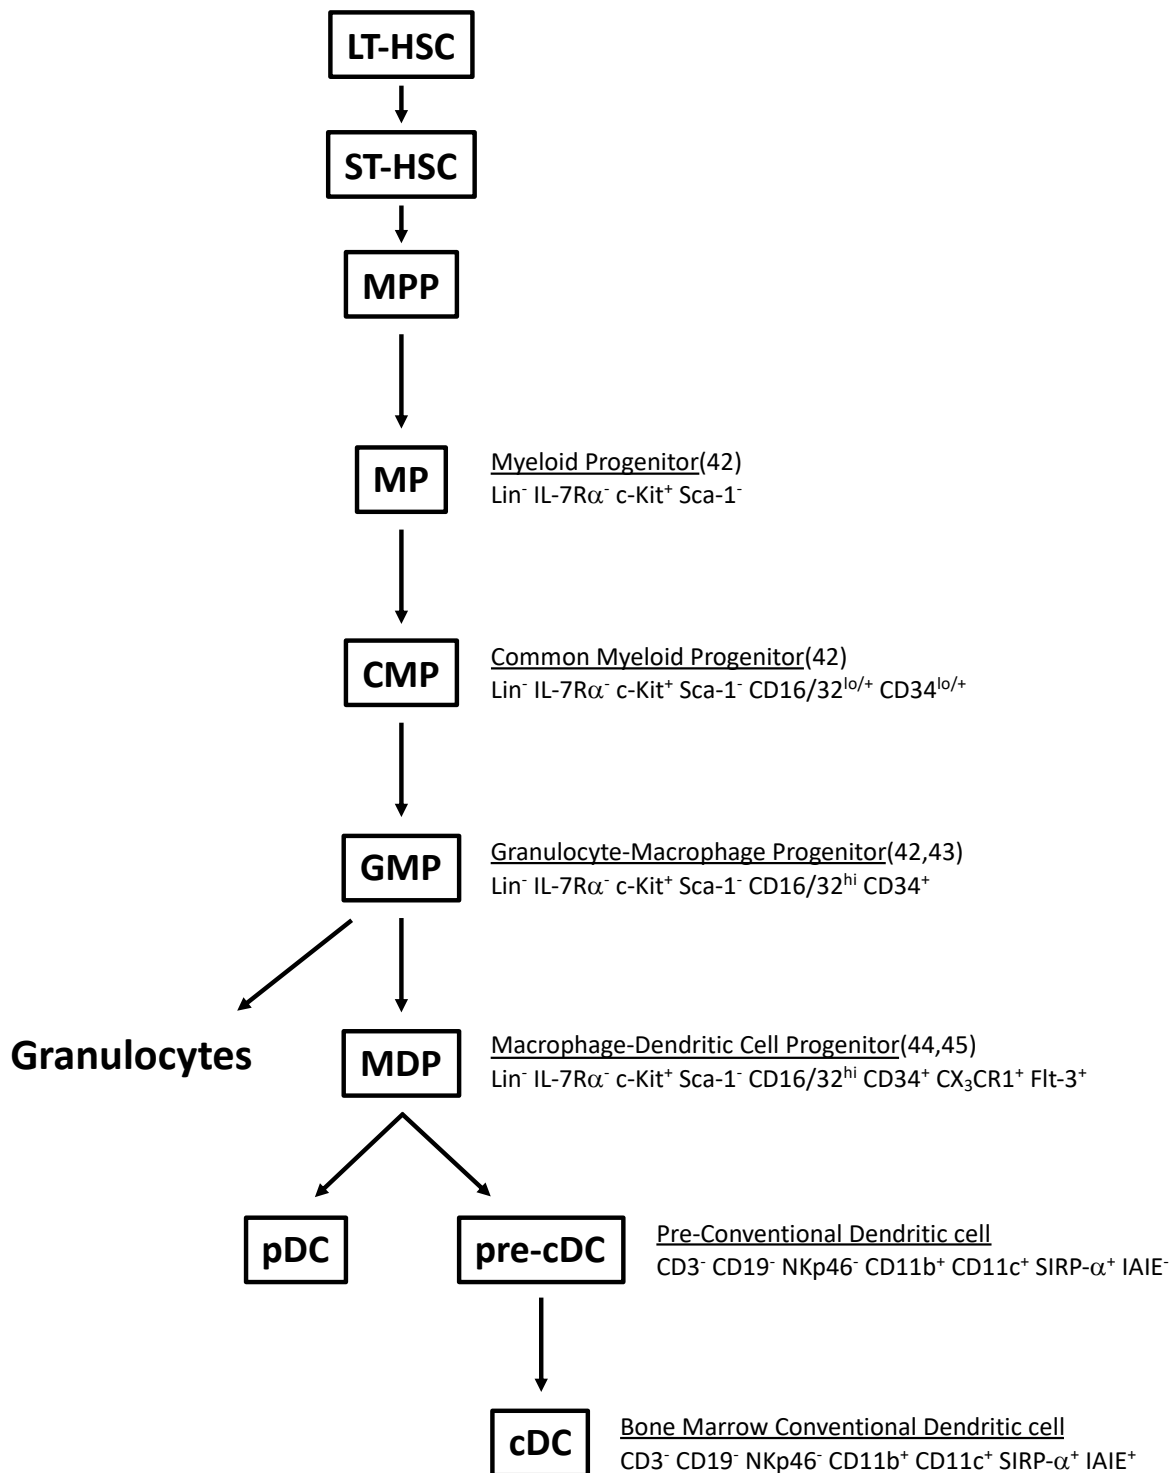

**Supplementary Figure 2. Hierarchical commitment of HSPCs to granulocytes, pDCs and cDCs.** Developmental pathway within the bone marrow resulting in the generation of terminally committed granulocytes, pDCs and cDCs and the associated cellular markers used to identify individual cell types. LT-HSC = long-term hematopoietic stem cell, ST-HSC = short-term hematopoietic stem cell, MPP = multipotent progenitor.

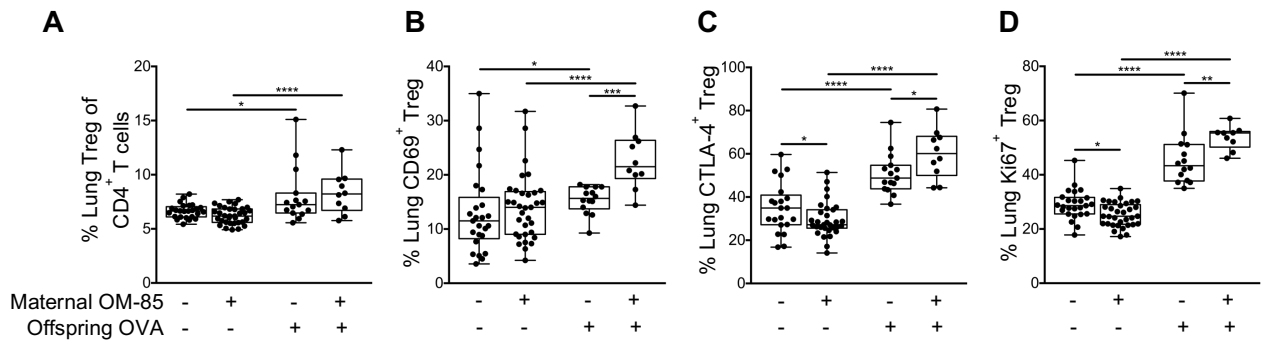

**Supplementary Figure 3. Offspring peripheral lung Treg response following maternal OM-85 treatment.** (A-D) Analysis of Tregs in peripheral lung showing (A) Tregs as a proportion of total CD4<sup>+</sup> T-cells, (B) proportion of Treg CD69<sup>+</sup>, (C) proportion of Treg CTLA-4<sup>+</sup> and (D) proportion of Treg Ki67<sup>+</sup> in naïve controls versus OVA sensitised and aerosol challenged offspring from OM-85 treated/untreated mothers. Data displayed as box and whisker plot showing median, Q<sub>1</sub> and Q<sub>3</sub> and min to max values of n<sub>≥</sub>9 independent experiments. Statistical significance was determined using Student's t-test or Mann-Whitney test and presented as \*p<0.05, \*\*p<0.01, \*\*\*p<0.001, \*\*\*\*p<0.0001.

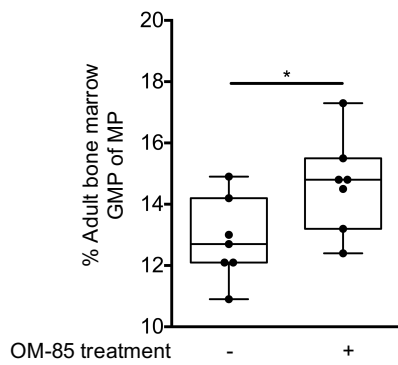

**Supplementary Figure 4. Adult bone marrow response to direct OM-85 treatment.**

Analysis of GMPs in adult bone marrow as a proportion of MPs in naïve control versus OM-85 treated mice. Data displayed as box and whisker plot showing median, Q<sub>1</sub> and Q<sub>3</sub> and min to max values of n=4 independent experiments. Statistical significance was determined using Student's t-test and presented as \*p<0.05.

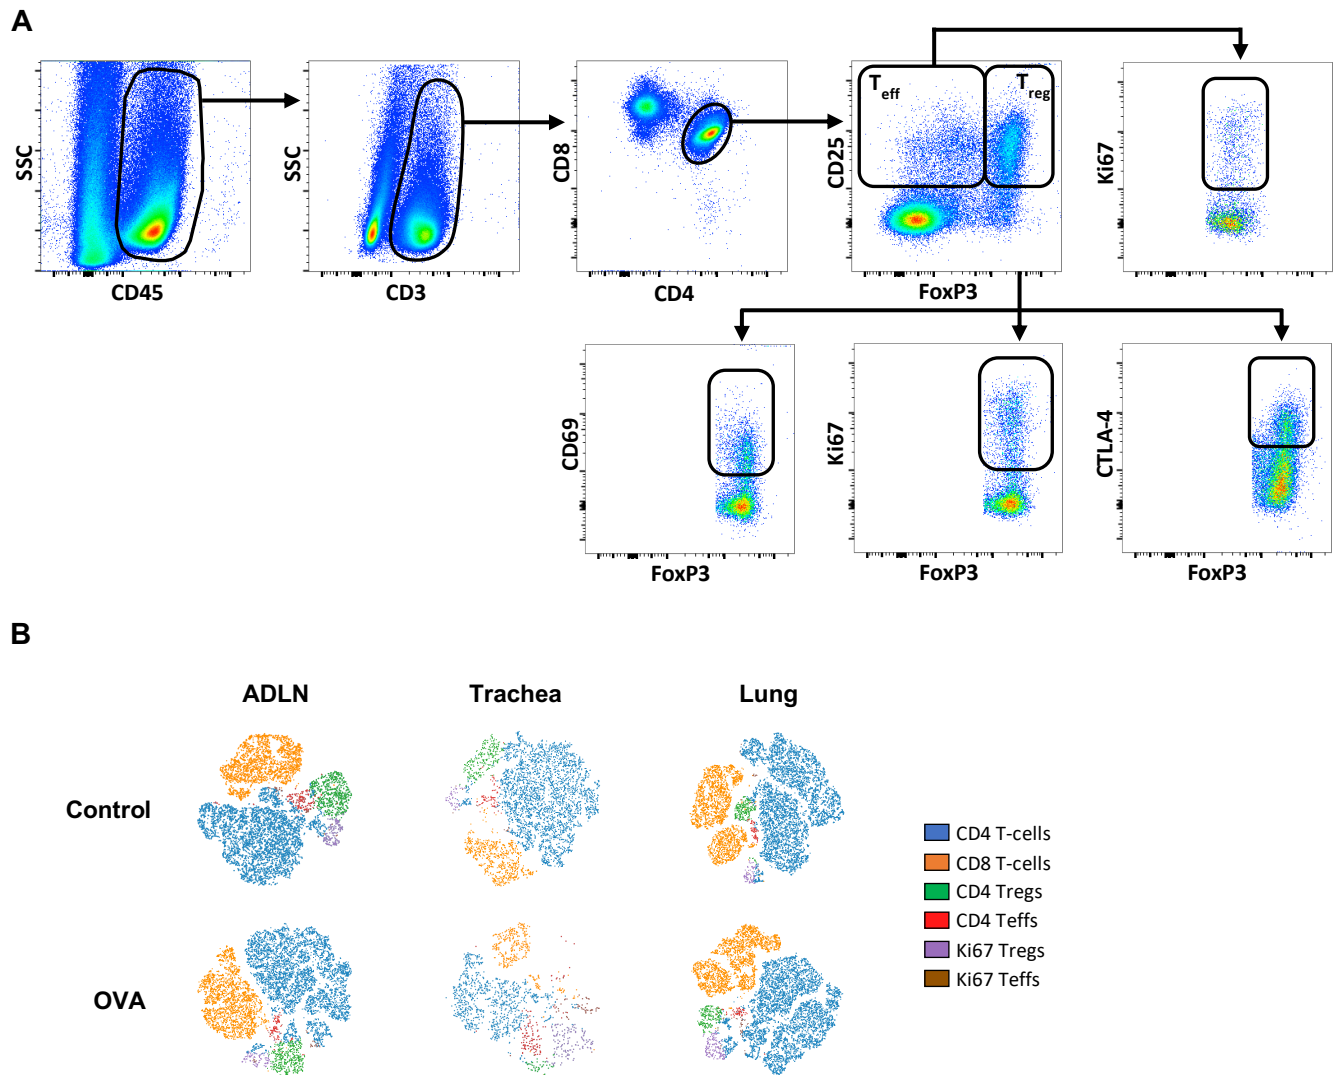

**Supplementary Figure 5. Immunophenotyping gating strategy to characterize airways T-cell subsets.** (A) Representative FlowJo® gating strategy used to identify T-cell subsets within ADLN, trachea and peripheral lung digests via multi-colour flow cytometry (B) Representative FlowJo® contour plot displaying FoxP3-phycoerythrin fluorescence minus one (FMO) antibody staining control. (C) Visual representation (n=2) of viSNE clustering shown for CD45<sup>+</sup>CD3<sup>+</sup> cells within ADLN, trachea and peripheral lung single cell suspensions and with analysis of 7 parameters. CD4 T cells (CD3<sup>+</sup>CD4<sup>+</sup>CD8α<sup>-</sup>), CD8 T cells (CD3<sup>+</sup>CD4<sup>-</sup>CD8α<sup>+</sup>), CD4 Tregs (CD3<sup>+</sup>CD4<sup>+</sup>CD8α<sup>-</sup>CD25<sup>+</sup>FoxP3<sup>+</sup>), CD4 Teff (CD3<sup>+</sup>CD4<sup>+</sup>CD8α<sup>-</sup>CD25<sup>+</sup>FoxP3<sup>-</sup>), Ki67 Treg (CD3<sup>+</sup>CD4<sup>+</sup>CD8α<sup>-</sup>CD25<sup>+</sup>FoxP3<sup>+</sup>Ki67<sup>+</sup>) and Ki67 Teff (CD3<sup>+</sup>CD4<sup>+</sup>CD8α<sup>-</sup>CD25<sup>+</sup>FoxP3<sup>-</sup>Ki67<sup>+</sup>) were delineated based on surface and intracellular marker co-expression.

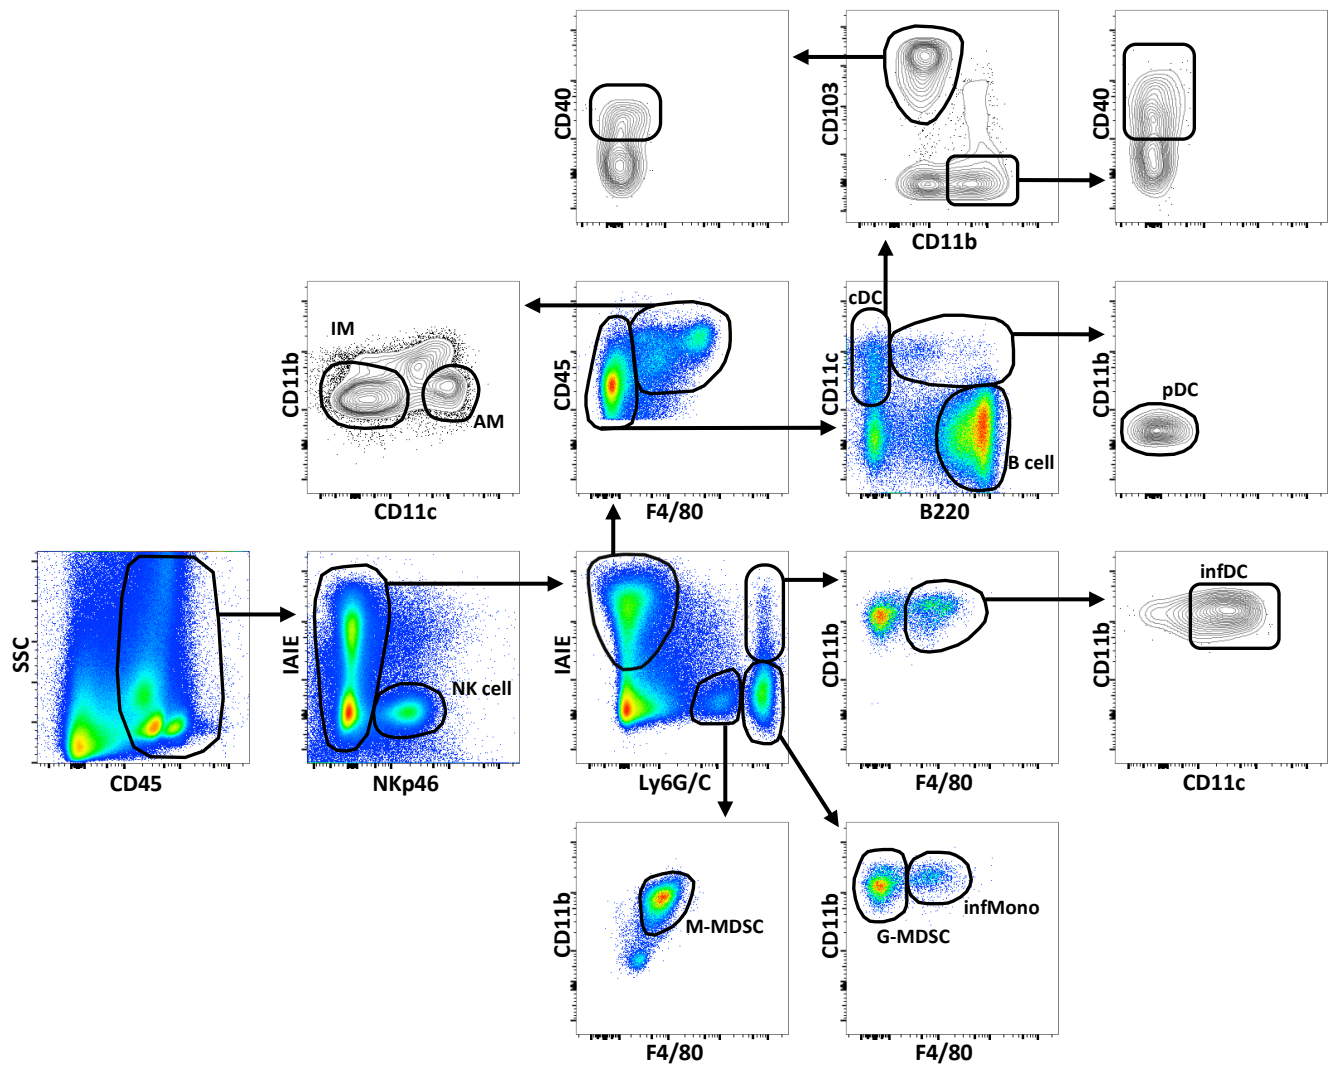

**Supplementary Figure 6. Immunophenotyping gating strategy to characterize myeloid populations.** Representative FlowJo® gating strategy used to identify dendritic cell subsets within ADLN, trachea, peripheral lung and bone marrow cultures via multi-colour flow cytometry.

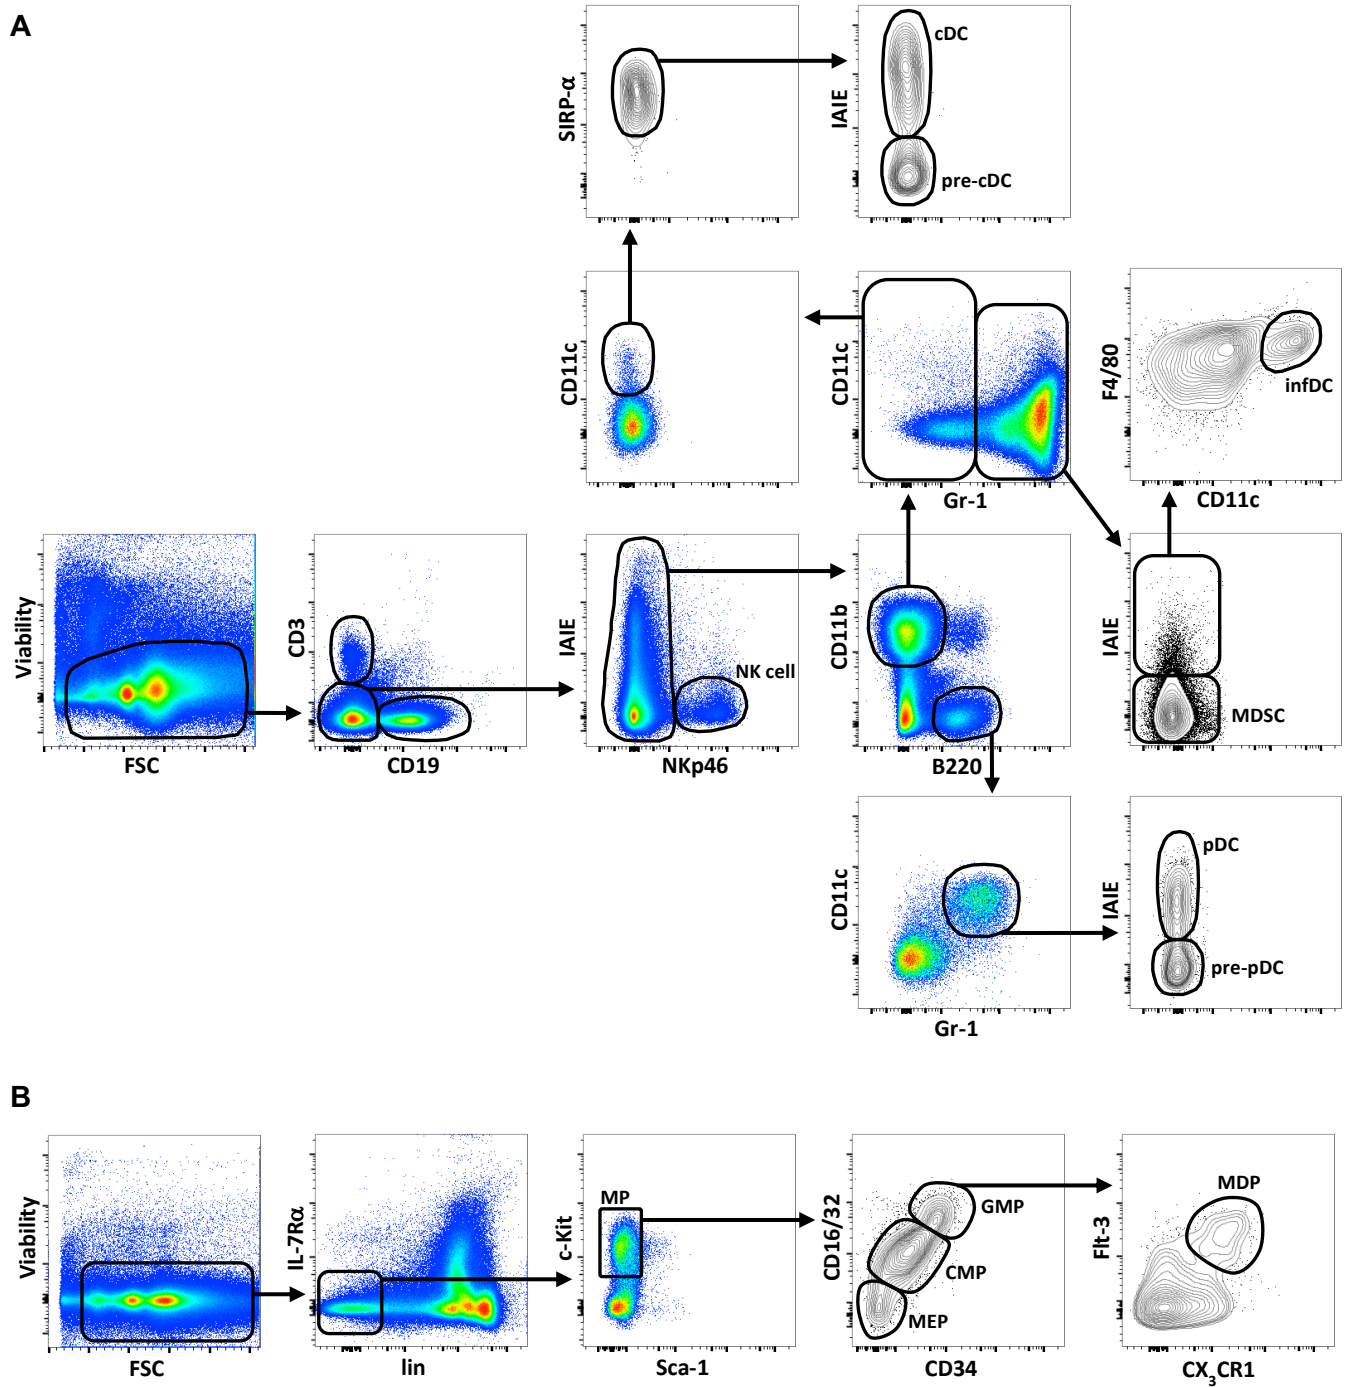

**Supplementary Figure 7. Immunophenotyping gating strategy to characterize bone marrow cellular subsets.** Representative FlowJo® gating strategies used to identify multiple (A) committed myeloid and (B) hematopoietic stem and progenitor cell populations within bone marrow samples via multi-colour flow cytometry.



**Supplementary Table 1. Airways T cell monoclonal fluorescent-labelled antibody panel**

| <b>Antibody</b>                   | <b>Fluorochrome</b> | <b>Clone</b> | <b>Supplier</b> |
|-----------------------------------|---------------------|--------------|-----------------|
| Rat Anti-Mouse CD3                | FITC                | 17A2         | BD Biosciences  |
| Rat Anti-Mouse CD4                | V500                | RM4-5        | BD Biosciences  |
| Rat Anti-Mouse CD8a               | BV650               | 53-6.7       | BD Biosciences  |
| Rat Anti-Mouse CD25               | APC-Cy7             | PC61         | BD Biosciences  |
| Rat Anti-Mouse CD45               | PerCP               | 30-F11       | BD Biosciences  |
| Hamster Anti-Mouse CD69           | PE-Cy7              | H1.2F3       | BD Biosciences  |
| Hamster Anti-Mouse CTLA-4 (CD152) | BV421               | UC10-4B9     | BioLegend       |
| Anti-Mouse/Rat FoxP3              | PE                  | FJK-16S      | BD Biosciences  |
| Mouse Anti-Ki67                   | AF700               | B56          | BD Biosciences  |

**Supplementary Table 2. Myeloid cell monoclonal fluorescent-labelled antibody panel**

| <b>Antibody</b>              | <b>Fluorochrome</b> | <b>Clone</b> | <b>Supplier</b> |
|------------------------------|---------------------|--------------|-----------------|
| Rat Anti-Mouse CD8a          | BV650               | 53-6.7       | BD Biosciences  |
| Rat Anti-Mouse CD11b         | V500                | M1/70        | BD Biosciences  |
| Hamster Anti-Mouse CD11c     | AF700               | HL3          | BD Biosciences  |
| Rat Anti-Mouse CD40          | BV421               | 3/32         | BD Biosciences  |
| Rat Anti-Mouse CD45          | PerCP               | 30-F11       | BD Biosciences  |
| Rat Anti-Mouse CD86          | Biotin              | PO3          | BD Biosciences  |
| Rat Anti-Mouse CD103         | PE                  | M290         | BD Biosciences  |
| Rat Anti-Mouse IA-IE         | AF647               | M5/114.15.2  | BD Biosciences  |
| Rat Anti-Mouse B220 (CD45R)  | PE-CF594            | RA3-6B2      | BD Biosciences  |
| Rat Anti-Mouse Ly6G/C        | APC-Cy7             | RB6-8C5      | BD Biosciences  |
| Rat Anti-Mouse NKp46 (CD335) | PE-Cy7              | 29A1.4       | BioLegend       |
| Rat Anti-Mouse F4/80         | FITC                | BM8          | BioLegend       |
| Streptavidin                 | PE-Cy5              | -            | BD Biosciences  |

**Supplementary Table 3. Bone marrow hematopoietic stem and progenitor cell monoclonal fluorescent-labelled antibody panel**

| <b>Antibody</b>               | <b>Fluorochrome</b> | <b>Clone</b> | <b>Supplier</b> |
|-------------------------------|---------------------|--------------|-----------------|
| Rat Anti-Mouse CD2            | Biotin              | RM2-5        | BD Biosciences  |
| Hamster Anti-Mouse CD3        | Biotin              | 145-2C11     | BD Biosciences  |
| Rat Anti-Mouse CD4            | Biotin              | GK1.5        | BD Biosciences  |
| Rat Anti-Mouse CD5            | Biotin              | 53-7.3       | BD Biosciences  |
| Rat Anti-Mouse CD8a           | Biotin              | 53-6.7       | BD Biosciences  |
| Rat Anti-Mouse CD19           | Biotin              | 1D3          | BD Biosciences  |
| Rat Anti-Mouse B220 (CD45R)   | Biotin              | RA3-6B2      | BD Biosciences  |
| Rat Anti-Mouse Gr-1           | Biotin              | RB6-8CS      | BD Biosciences  |
| Rat Anti-MouseTer119          | Biotin              | TER-119      | BD Biosciences  |
| Rat Anti-Mouse CD16/32        | PerCP-Cy5.5         | 2.4G2        | BD Biosciences  |
| Rat Anti-Mouse CD34           | FITC                | RAM34        | BD Biosciences  |
| Rat Anti-Mouse IL-7Ra (CD135) | PE-Cy7              | SB/199       | BD Biosciences  |
| Rat Anti-Mouse Flt-3 (CD135)  | PE                  | A2F10.1      | BD Biosciences  |
| Rat Anti-Mouse c-Kit (CD117)  | APC-Cy7             | 2B8          | BD Biosciences  |
| Rat Anti-Mouse Sca-1          | BV510               | D7           | BD Biosciences  |
| Rat Anti-Mouse CX3CR1         | APC                 | SA011F11     | BioLegend       |
| Rat Anti-Mouse NKG28          | BV711               | CX5          | BD Biosciences  |
| Viability                     | AF700               | -            | BD Biosciences  |
| Streptavidin                  | BV605               | -            | BD Biosciences  |

**Supplementary Table 4. Bone marrow committed myeloid cell monoclonal fluorescent-labelled antibody panel**

| <b>Antibody</b>                | <b>Fluorochrome</b> | <b>Clone</b> | <b>Supplier</b> |
|--------------------------------|---------------------|--------------|-----------------|
| Rat Anti-Mouse CD3             | FITC                | 17A2         | BD Biosciences  |
| Rat Anti-Mouse CD11b           | BV510               | M1/70        | BD Biosciences  |
| Hamster Anti-Mouse CD11c       | BV711               | HL3          | BD Biosciences  |
| Rat Anti-Mouse CD19            | APC-H7              | 1D3          | BD Biosciences  |
| Rat Anti-Mouse CD24            | PE                  | M1/69        | BD Biosciences  |
| Rat Anti-Mouse Gr-1            | Biotin              | RB6-6B2      | BD Biosciences  |
| Rat Anti-Mouse B220 (CD45R)    | PerCP-Cy5.5         | RA3-6B2      | BD Biosciences  |
| Rat Anti-Mouse NKp46 (CD335)   | PE-Cy7              | 29A1.4       | BioLegend       |
| Rat Anti-Mouse SIRP-a (CD172a) | APC                 | P84          | BioLegend       |
| Rat Anti-Mouse IA-IE           | BV421               | M5/114.15.2  | BioLegend       |
| Rat Anti-Mouse F4/80           | BV785               | BM8          | BioLegend       |
| Viability                      | AF700               | -            | BD Biosciences  |
| Streptavidin                   | BV605               | -            | BD Biosciences  |
